# Supplementary material for: Neuronal influences are necessary to produce mitochondrial co-localization with glutamate transporters in astrocytes
Source: PubMed Central journal article supplement (PMC4283053; doi:10.1111/jnc.12759), 2014-06-16
Supplement: jnc0130-0668-SD3.pdf [file jnc0130-0668-SD3.pdf]

Neuronal influences are necessary to produce mitochondrial co-localization with glutamate transporters in astrocytes

Christopher I Ugbo<sup>\*‡</sup>, Warren D. Hirst<sup>†</sup>, Marcus Rattray<sup>‡1</sup>

### **Supporting Information 1**

#### **Astrocyte stellation under rho kinase inhibition.**

Phase contrast time lapse video (24 h) showing astrocyte stellation under rho kinase inhibition using Y27632 (100 $\mu$ M). The video starts roughly 40 minutes after the application of the drug due to setting up the microscope; indicating that the morphological change happens rapidly; without affecting cell number (over time).

### **Supporting information 2.**

#### **Peripheral astrocyte processes emanating from filpodia express V5-GLT-1.**

Confocal z-stack showing double transfected astrocytes (V5-GLT-1 and pDs-Red 1 mito; green and red respectively) treated with Y27632 for 24 h. The filpodia are decorated with GLT-1 however there is lack of mitochondrial distribution in the finer processes.
